# Supplementary material for: Vast Differences in Strain-Level Diversity in the Gut Microbiota of Two Closely Related Honey Bee Species
Source: PubMed Central journal article supplement — Curr Biol. 2020 Jul 6;30(13):2520–2531.e7. doi: 10.1016/j.cub.2020.04.070 (PMC7342003; doi:10.1016/j.cub.2020.04.070), 2020-07-06
Supplement: mmc4.pdf [file mmc4.pdf]

**Bifido-1**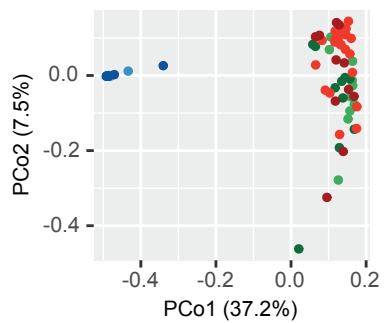**Bifido-2**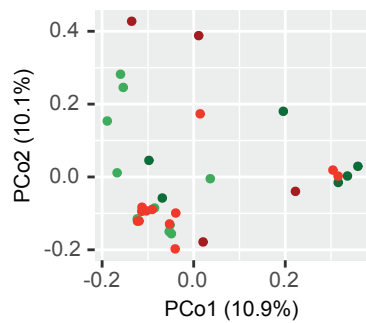**Firm5-1**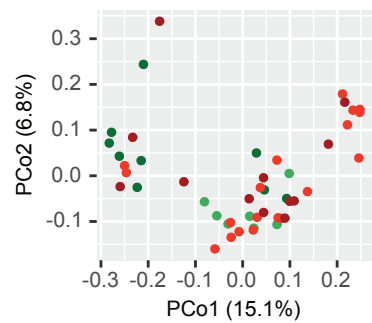**Firm5-2**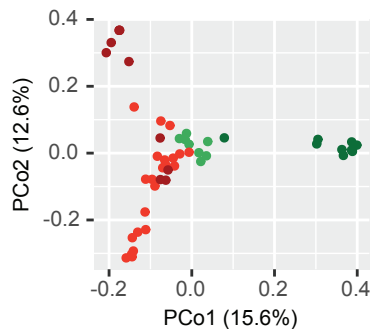**Firm5-3**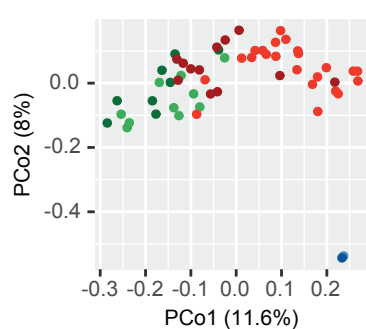**Firm5-4**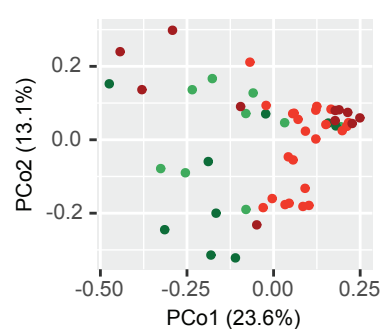**Firm5-7**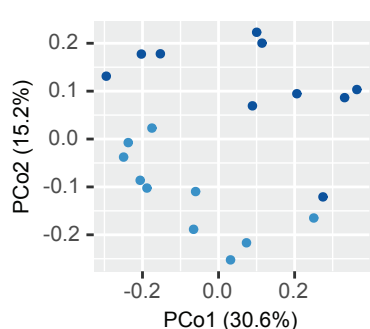**Firm4-1**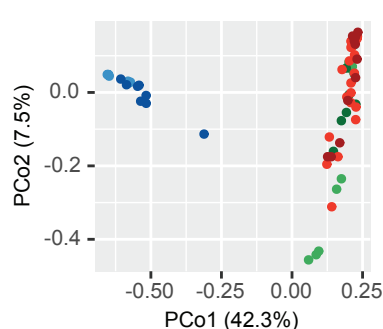**Firm4-2**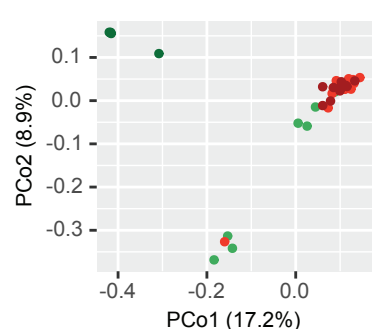**Gilli-1**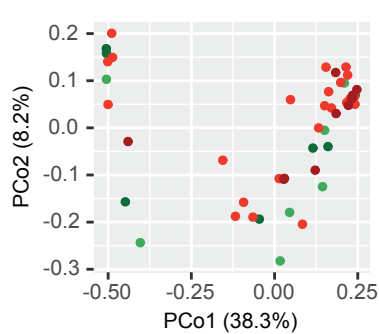**Gilli-2**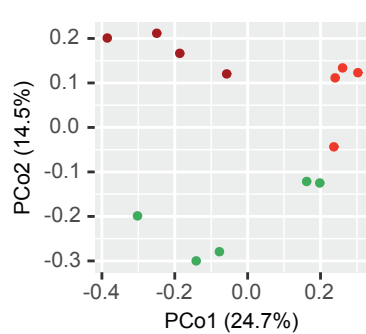**Gilli-3**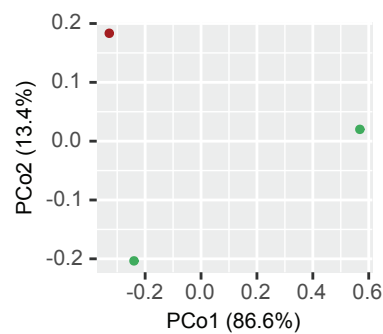

Gilli-4

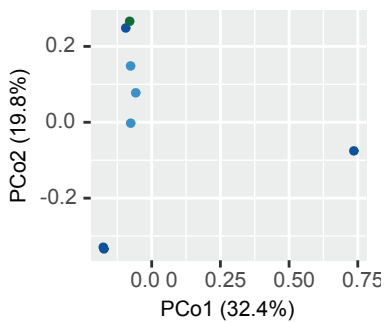

Gilli-5

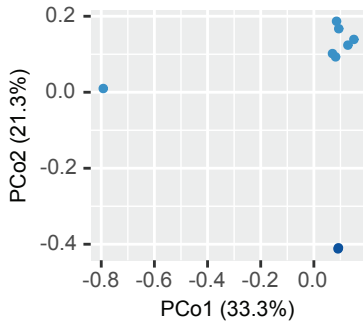

Gilli-6

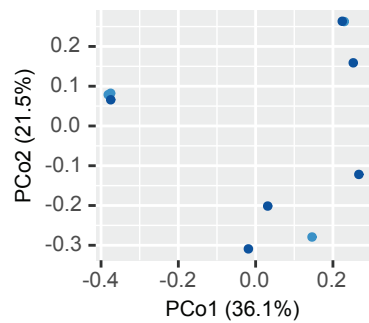

Snod-1

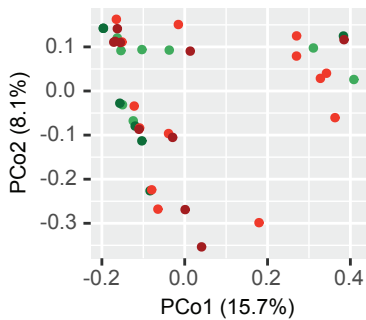

Snod-2

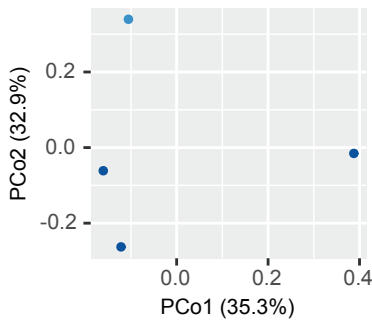*Apibacter* sp.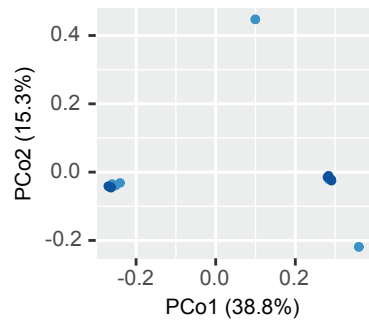*Bartonella apis*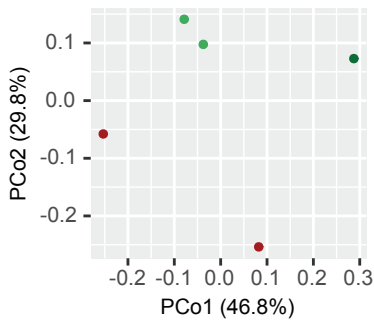*Commensalibacter* sp.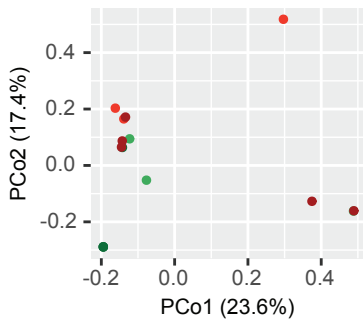*Frischella perrara*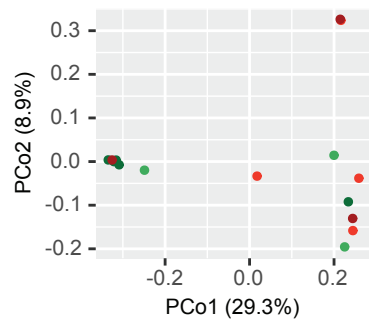*Lactobacillus kunkeei*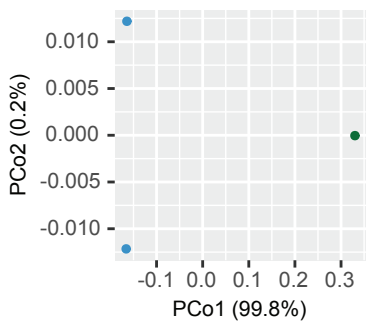

Bee sample type

- Am CH Colony Dr
- Am CH Colony Gr
- Am JP Colony Ai
- Am JP Colony Ut
- Ac JP Colony Ch
- Ac JP Colony Kn
